# Supplementary material for: Elucidating the origin of oxide ion blocking effects at GDC/SrZr(Y)O3/YSZ interfaces
Source: Royal Society of Chemistry journal article supplement (doi:10.1039/c7ta01589e), 2017-01-01
Supplement: c7ta01589e1.pdf [file c7ta01589e1.pdf]

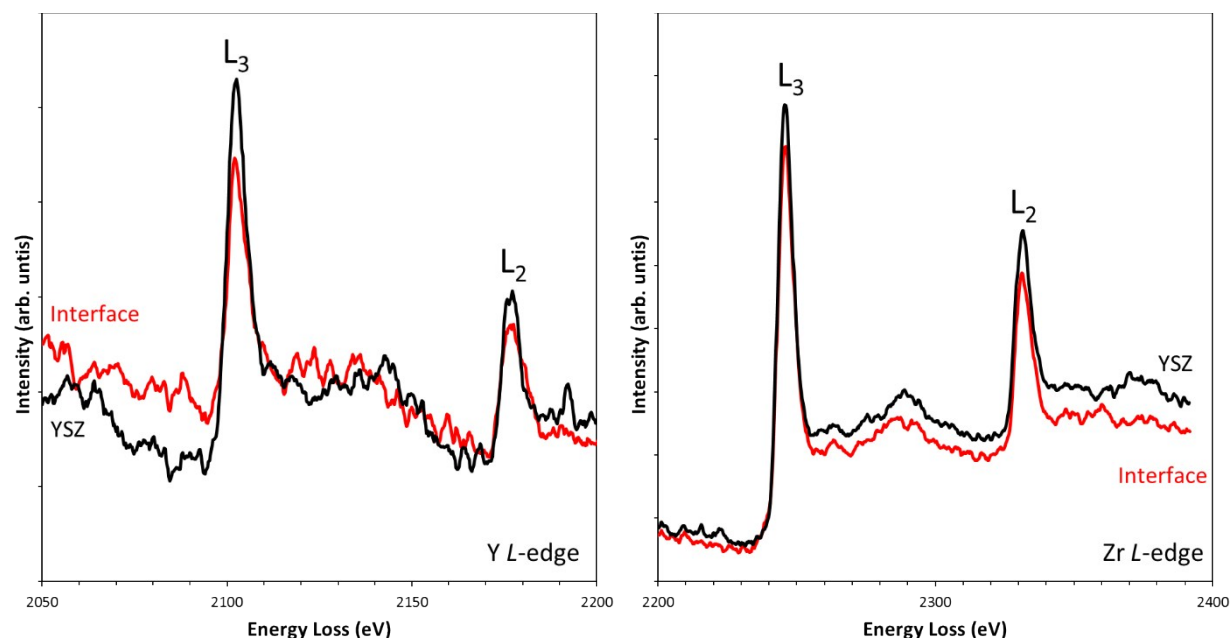

Fig. S1. STEM-EELS spectra of Y and Zr  $L$ -edge peaks acquired at the interface and YSZ substrate  $\sim 50$  nm from the interface with SZY.

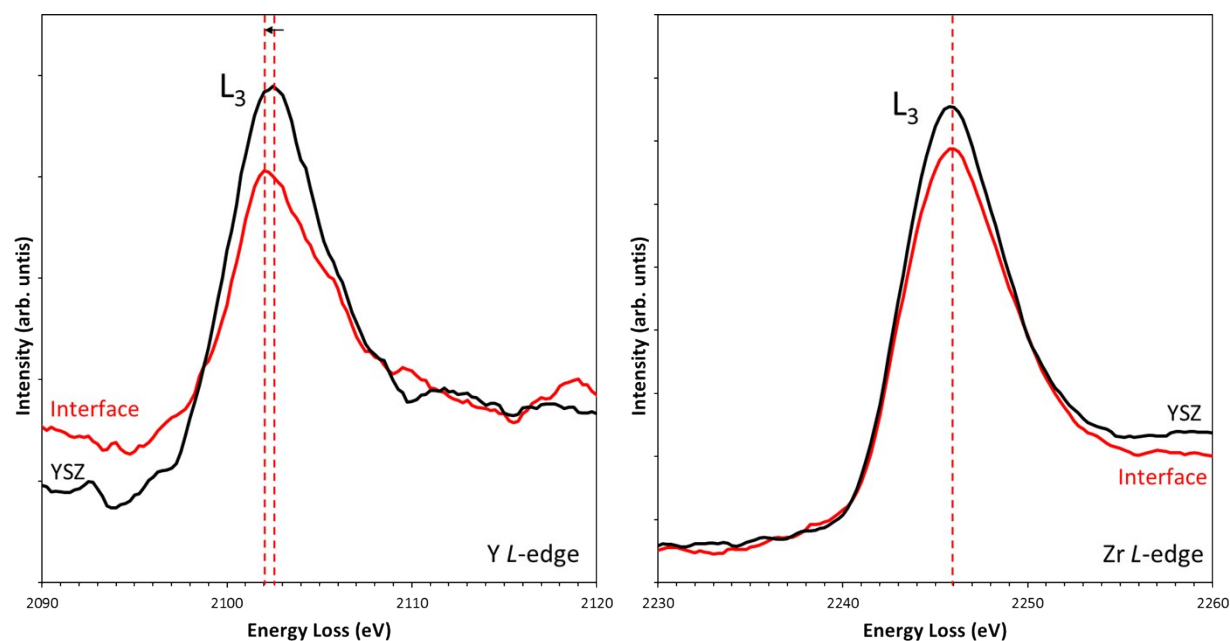

Fig. S2. Comparison of Y and Zr  $L_3$ -edge peaks acquired at the interface and YSZ substrate  $\sim 50$  nm from the interface with SZY. A significant decrease in intensity as well as a small shift ( $< \sim 1$  eV) towards lower energy loss is observed for the Y  $L$ -edge.
